# Supplementary material for: Development and Application of Fruit Color-Related Expressed Sequence Tag-Simple Sequence Repeat Markers in Abelmoschus esculentus on the Basis of Transcriptome Sequencing
Source: Front Plant Sci. 2022 May 23;13:907895. doi: 10.3389/fpls.2022.907895 (PMC9168766; doi:10.3389/fpls.2022.907895)
Supplement: Supplementary file 1 [file Table_1.xls]

## Sheet: Sheet1
Supplemental Table 1 Details regarding the 153 Abelmoschus esculentus varieties/strains included in this study
Number	Variety (strain) code name	fruit color	color value
AE1	GZ-012	green	2
AE2	GZ-014	green	2
AE3	GZ-028	dark green	3
AE4	GZ-032	dark green	3
AE5	GZ-033	dark green	3
AE6	GZ-040	dark green	3
AE7	GZ-041	dark green	3
AE8	GZ-043	green	2
AE9	GZ-052	light green	1
AE10	GZ-060	green	2
AE11	GZ-065	green	2
AE12	GZ-067	dark green	3
AE13	GZ-084	dark green	3
AE14	GZ-089	light green	1
AE15	GZ-094	light green	1
AE16	GZ-119	green	2
AE17	GZ-138	mauve	5
AE18	GZ-144	light green	1
AE19	GZ-153	light green	1
AE20	GZ-160	dark green	3
AE21	GZ-162	light green	1
AE22	GZ-163	green	2
AE23	GZ-164	pink	4
AE24	GZ-165	green	2
AE25	GZ-169	pink	4
AE26	GZ-170	green	2
AE27	GZ-171	light green	1
AE28	GZ-172	mauve	5
AE29	GZ-173	light green	1
AE30	GZ-181	green	2
AE31	GZ-182	dark green	3
AE32	GZ-183	dark green	3
AE33	GZ44	light green	1
AE34	GZ50	dark green	3
AE35	GZ64	pink	4
AE36	GZ78	mauve	5
AE37	GZ100	green	2
AE38	GZ108	pink	4
AE39	GZ146	light green	1
AE40	GZ158	mauve	5
AE41	42	light green	1
AE42	86	mauve	5
AE45	77	light green	1
AE46	78	dark green	3
AE48	79	light green	1
AE49	80	mauve	5
AE50	GZ-1	light green	1
AE51	GZ-3	green	2
AE52	GZ-19	light green	1
AE53	GZ-20	green	2
AE54	GZ-36	dark green	3
AE55	GZ-38	green	2
AE56	GZ-42	light green	1
AE57	GZ-50	green	2
AE58	GZ-55	dark green	3
AE59	GZ-82	pink	4
AE60	GZ-98	pink	4
AE61	GZ-115	green	2
AE62	GZ-116	mauve	5
AE63	GZ-117	pink	4
AE64	GZ-158	green	2
AE65	GZ-214	dark green	3
AE66	GZ-217	green	2
AE67	GZ-225	green	2
AE68	GZ-234	dark green	3
AE69	GZ-239	dark green	3
AE70	81	pink	4
AE71	82	dark green	3
AE72	GZ-023	green	2
AE73	83	light green	1
AE74	84	pink	4
AE75	85	dark green	3
AE76	86	green	2
AE77	87	dark green	3
AE78	88	green	2
AE79	89	dark green	3
AE80	90	light green	1
AE81	91	mauve	5
AE82	92	green	2
AE83	93	green	2
AE84	94	mauve	5
AE85	95	dark green	3
AE86	96	mauve	5
AE87	97	dark green	3
AE88	GZ-167	dark green	3
AE89	GZ-112	green	2
AE90	GZ-092	green	2
AE91	GZ-035	green	2
AE92	GZ-085	green	2
AE93	GZ-155	pink	4
AE94	98	green	2
AE95	D02	green	2
AE96	GZ-129	light green	1
AE97	GZ-066	green	2
AE98	GZ-017	light green	1
AE99	99	dark green	3
AE100	GZ-079	dark green	3
AE101	100	dark green	3
AE102	GZ-140	dark green	3
AE103	GZ-071	dark green	3
AE104	GZ-133	green	2
AE105	GZ-062	dark green	3
AE106	GZ-058	dark green	3
AE107	101	mauve	5
AE108	D01	light green	1
AE109	GZ-018	light green	1
AE110	GZ-099	green	2
AE111	102	green	2
AE112	103	green	2
AE113	104	dark green	3
AE114	GZ-139	green	2
AE115	105	dark green	3
AE116	106	green	2
AE117	107	dark green	3
AE118	GZ-093	dark green	3
AE119	108	green	2
AE120	GZ-103	green	2
AE121	GZ-010	green	2
AE122	GZ-037	dark green	3
AE123	GZ-096	green	2
AE124	GZ-111	green	2
AE125	GZ-127	pink	4
AE126	GZ-011	green	2
AE127	GZ-124	pink	4
AE128	109	green	2
AE129	GZ-086	dark green	3
AE130	GZ-131	mauve	5
AE131	GZ-007	green	2
AE132	GZ-072	dark green	3
AE133	GZ-024	green	2
AE134	GZ-016	green	2
AE135	GZ-063	dark green	3
AE136	GZ-101	green	2
AE137	GZ-025	dark green	3
AE138	GZ-141	green	2
AE139	GZ-069	green	2
AE140	GZ-114	green	2
AE141	GZ-152	green	2
AE142	GZ-130	pink	4
AE143	GZ-156	green	2
AE144	GZ-159	light green	1
AE145	GZ-077	light green	1
AE146	GZ-081	dark green	3
AE147	GZ-113	light green	1
AE148	110	green	2
AE149	111	light green	1
AE150	GZ-073	dark green	3
AE151	GZ-076	dark green	3
AE152	GZ-004	green	2
AE153	GZ-022	green	2
AE154	GZ-030	green	2
AE155	GZ-045	light green	1
AE156	GZ-083	green	2
